# Supplementary material
Source: publisher site journal article supplement (https://www.dovepress.com/article/321282)
Supplement: Supplementary file 1 [file get_supplementary_file.php]

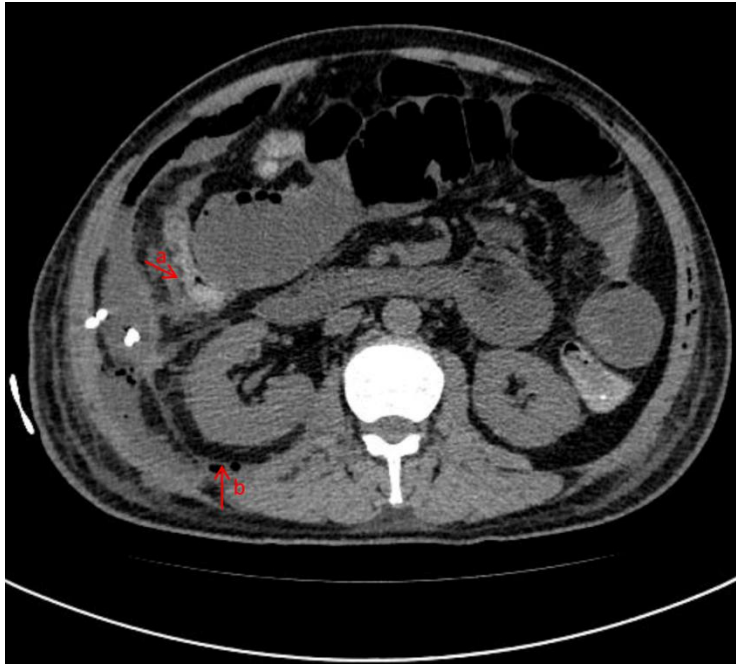

**Figure 1 supplement** CT image of abdominal infection and retroperitoneal infection. a. abdominal infection; b. retroperitoneal infection.
